# Supplementary material for: Four 3D coordination polymers based on layers with single syn–anti carboxylate bridges: synthesis, structures, and magnetic properties
Source: Royal Society of Chemistry journal article supplement (doi:10.1039/c8ra01900b), 2018-01-01
Supplement: c8ra01900b1.pdf [file c8ra01900b1.pdf]

## Four 3D coordination polymers based on layers with single *syn-anti* carboxylate bridges: synthesis, structures, and magnetic properties

Wei Gao<sup>ab</sup>, Feng Liu<sup>b</sup>, Xiu-Mei Zhang<sup>\*b</sup>, Jie-Ping Liu<sup>b</sup> and Qing-Yu Gao<sup>\*a</sup>

**Table S1** Selected bond lengths (Å) and angles (°) for CPs **2-4**

|            | <b>2</b> (M = Co) | <b>3</b> (M = Ni) | <b>4</b> (M = CoNi) |
|------------|-------------------|-------------------|---------------------|
| M1-O1      | 2.149(2)          | 2.111(3)          | 2.119(3)            |
| M1-O4A     | 2.023(2)          | 2.004(3)          | 2.010(3)            |
| M1-O5B     | 2.087(2)          | 2.061(3)          | 2.070(3)            |
| M1-O7      | 2.117(3)          | 2.071(3)          | 2.096(4)            |
| M1-O6C     | 2.174(2)          | 2.108(3)          | 2.130(3)            |
| M1-N1B     | 2.117(3)          | 2.056(3)          | 2.077(3)            |
| M2-O2      | 2.107(2)          | 2.010(3)          | 2.021(3)            |
| M2-O8      | 2.013(3)          | 2.072(6)          | 2.083(6)            |
| M2-O9      | 2.158(3)          | 2.055(4)          | 2.074(5)            |
| O4A-M1-O5B | 168.70(10)        | 172.19(12)        | 171.89(12)          |
| O4A-M1-O7  | 91.62(10)         | 94.02(13)         | 93.91(13)           |
| O5B-M1-O7  | 98.37(10)         | 93.58(13)         | 94.00(13)           |
| O4A-M1-N1B | 92.65(10)         | 92.31(13)         | 92.67(12)           |
| O5B-M1-N1B | 78.16(10)         | 80.48(12)         | 79.86(12)           |
| O7-M1-N1B  | 171.32(11)        | 168.86(14)        | 167.86(14)          |
| O4A-M1-O1  | 92.49(10)         | 92.21(12)         | 92.20(12)           |
| O5B-M1-O1  | 83.44(10)         | 86.25(13)         | 86.21(13)           |
| O7-M1-O1   | 83.67(11)         | 88.22(14)         | 88.74(14)           |
| N1B-M1-O1  | 103.67(10)        | 100.69(13)        | 101.21(13)          |
| O4A-M1-O6C | 98.39(10)         | 92.48(12)         | 92.87(12)           |
| O5B-M1-O6C | 86.87(10)         | 89.63(13)         | 89.32(13)           |
| O7-M1-O6C  | 90.28(11)         | 87.50(14)         | 86.86(14)           |

|            |            |            |            |
|------------|------------|------------|------------|
| N1B-M1-O6C | 81.63(10)  | 83.08(13)  | 82.62(13)  |
| O1-M1-O6C  | 167.70(9)  | 173.86(12) | 173.50(12) |
| O8D-M2-O8  | 180.0      | 180.000(2) | 180.000(2) |
| O8D-M2-O2  | 93.02(12)  | 89.0(2)    | 89.14(19)  |
| O8-M2-O2   | 86.98(12)  | 91.0(2)    | 90.86(19)  |
| O2-M2-O2D  | 180.00(13) | 180.0(2)   | 180.00(19) |
| O8-M2-O9   | 91.10(18)  | 89.3(3)    | 89.7(2)    |
| O8-M2-O9D  | 88.90(18)  | 90.7(3)    | 90.3(2)    |
| O2-M2-O9D  | 83.63(11)  | 93.28(16)  | 93.49(17)  |
| O2-M2-O9   | 96.37(11)  | 86.72(16)  | 86.51(17)  |
| O9-M2-O9D  | 180.0      | 180.000(1) | 180.000(2) |

---

Symmetry codes: A  $x, -y+1/2, z-1/2$ ; B  $-x+3, -y+1, -z+1$ ; C  $-x+3, y+1/2, -z+1/2$ ; D  $-x+4, -y+1, -z+1$ .

---

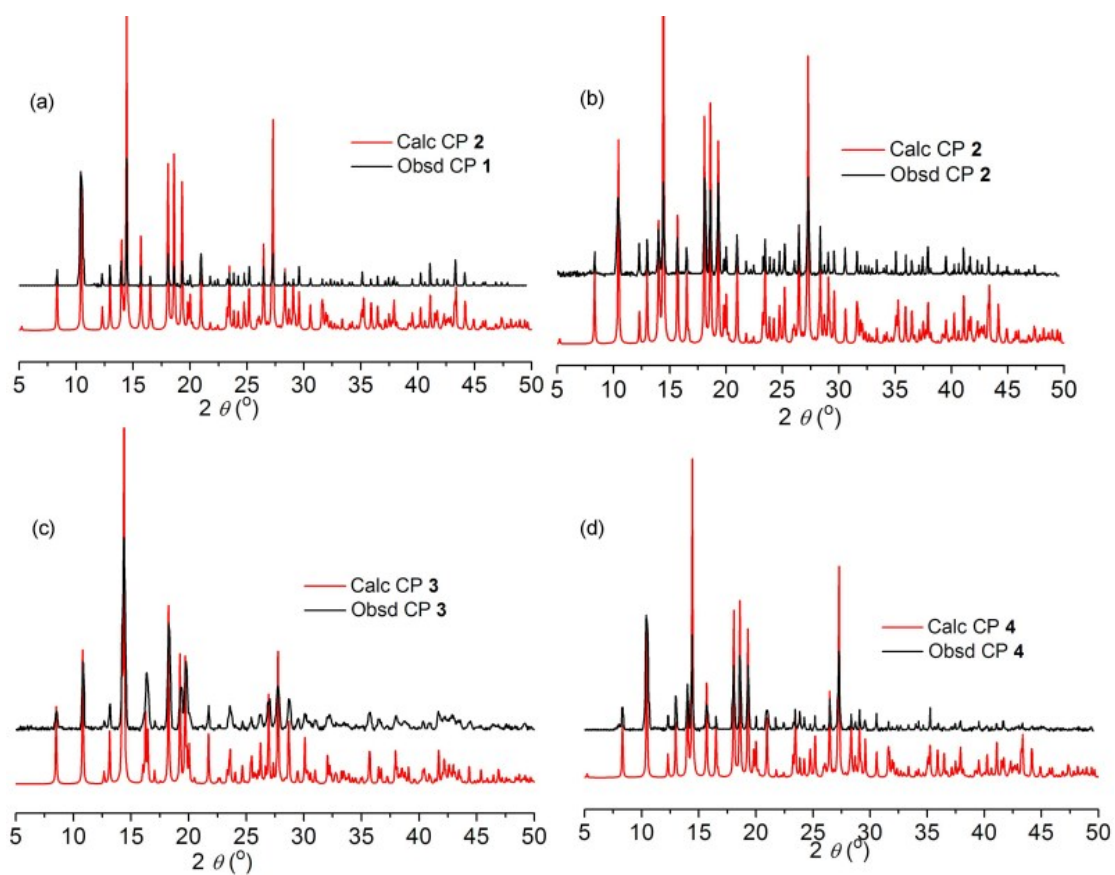

**Fig. S1** Powder X-ray diffraction profiles (black) of CPs 1-4 together with a simulation from the single crystal data (red).

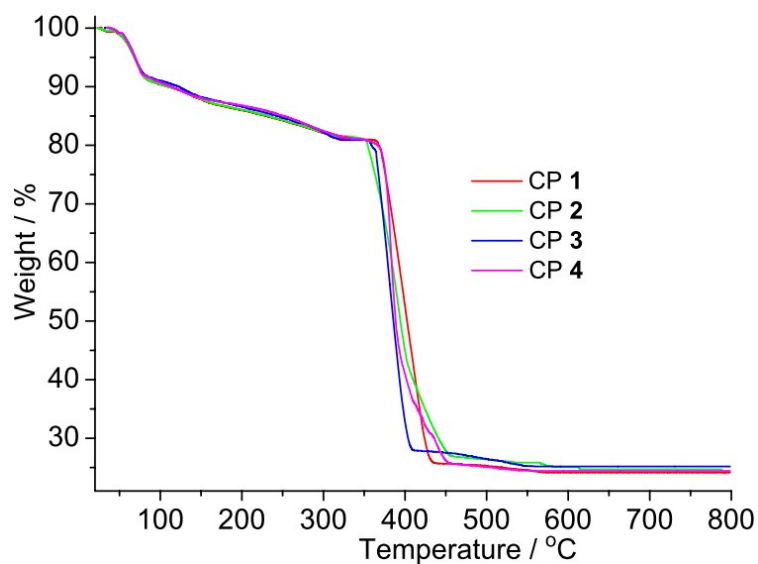

**Fig. S2** TGA curves of CPs 1-4.

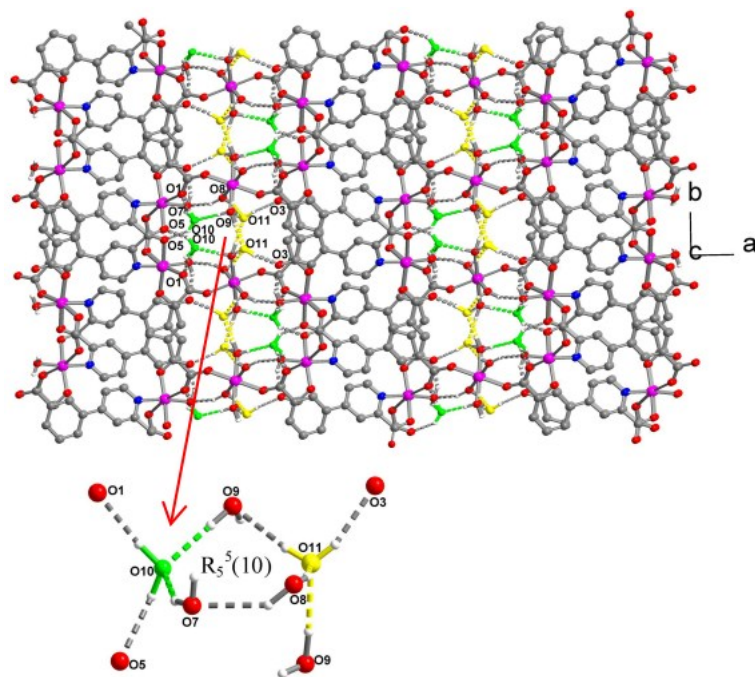

**Fig. S3** The 3D structures with hydrogen bonding interactions i CP **2**.

Table S2 Hydrogen bond lengths (Å) and angles (°) for CP **2**<sup>a</sup>.

| D   | A[Transformation]          | d(D-H) | d(H···A) | d(D···A) | <(DHA) |
|-----|----------------------------|--------|----------|----------|--------|
| O7  | O10[ x-1, y, z+1 ]         | 0.817  | 2.072    | 2.862    | 162.63 |
| O8  | O7 [ -x, -y+1, -z+1 ]      | 0.847  | 2.035    | 2.852    | 162.01 |
| O8  | O11 [ x-1, -y+3/2, z-1/2 ] | 0.849  | 1.849    | 2.683    | 167.18 |
| O9  | O10[ x-1, y, z ]           | 0.880  | 1.760    | 2.635    | 172.33 |
| O9  | O11[ -x+1, -y+1, -z+1 ]    | 0.869  | 2.027    | 2.894    | 174.84 |
| O10 | O1[ x+1, y, z ]            | 0.924  | 1.819    | 2.734    | 170.03 |
| O10 | O5[ -x+2, y-1/2, -z+1/2 ]  | 0.849  | 2.145    | 2.824    | 136.71 |
| O11 | O3[ x+1, y, z ]            | 0.833  | 1.982    | 2.739    | 150.55 |
| O11 | O9[ -x+1, y+1/2, -z+1/2 ]  | 0.845  | 2.013    | 2.846    | 168.64 |

<sup>a</sup>D, donor; A, acceptor.

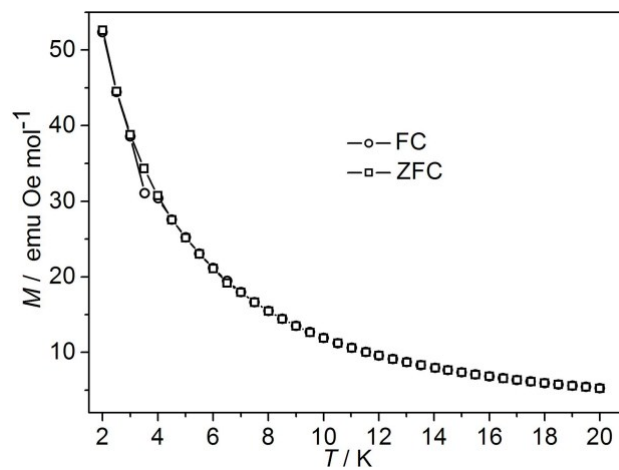

**Fig. S4** The ZFC and FC curves of CP 4.

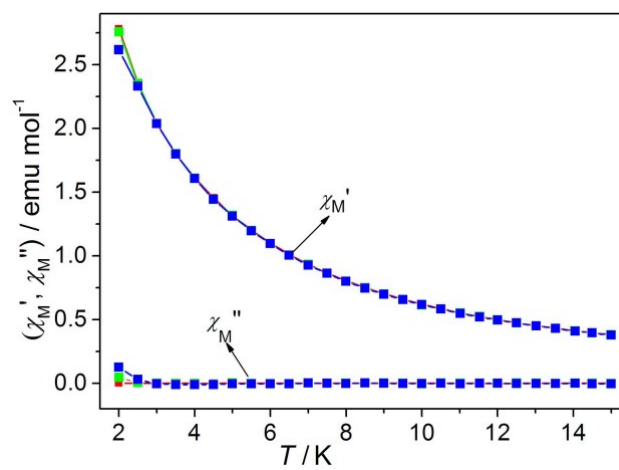

**Fig. S5**  $\chi'_M$  and  $\chi''_M$  plots for CP 4 at frequencies of 10, 100, and 1000 Hz with  $H_{\text{dc}} = 0$  and  $H_{\text{ac}} = 3.0$  Oe.
